# Supplementary material
Source: PubMed Central journal article supplement (PMC7144619)
Supplement: mmc1.pdf [file mmc1.pdf]

**Cell, Volume 181**

**Supplemental Information**

**Structural and Functional Basis**

**of SARS-CoV-2 Entry by Using Human ACE2**

**Qihui Wang, Yanfang Zhang, Lili Wu, Sheng Niu, Chunli Song, Zengyuan Zhang, Guangwen Lu, Chengpeng Qiao, Yu Hu, Kwok-Yung Yuen, Qisheng Wang, Huan Zhou, Jinghua Yan, and Jianxun Qi**

**Table S1. Comparison of hACE2 binding to SARS-CoV-2-CTD and SARS-RBD. Related to Figures 2 and 3 and Table 2.**

|                 |                              |                  |                  |                  |                  |                  |                  |                  |
|-----------------|------------------------------|------------------|------------------|------------------|------------------|------------------|------------------|------------------|
| <b>Residues</b> | <b>K417/V404<sup>a</sup></b> | <b>N439/R426</b> | <b>G446/T433</b> | <b>Y449/Y436</b> | <b>Y453/Y440</b> | <b>L455/Y442</b> | <b>F456/I443</b> | <b>Y473/F460</b> |
| <b>Contacts</b> | 4(1)/0 <sup>b</sup>          | 0/8(1)           | 4/0              | 13(2)/14(3)      | 5(1)/5(1)        | 13/9             | 14/3             | 1/0              |
| <b>Residues</b> | <b>A475/P462</b>             | <b>G476/D463</b> | <b>E484/P470</b> | <b>F486/I472</b> | <b>N487/N473</b> | <b>Y489/Y475</b> | <b>F490/W476</b> | <b>Q493/N479</b> |
| <b>Contacts</b> | 9(1)/1                       | 9/0              | 1/0              | 22/6             | 23(2)/14(3)      | 21/20            | 2/0              | 17/4             |
| <b>Residues</b> | <b>G496/G482</b>             | <b>Q498/Y484</b> | <b>T500/T486</b> | <b>N501/T487</b> | <b>G502/G488</b> | <b>V503/I489</b> | <b>Y505/Y491</b> |                  |
| <b>Contacts</b> | 21(1)/4                      | 20(3)/18         | 27(2)/32(2)      | 19(1)/22         | 12(1)/17(1)      | 0/2              | 40/33            |                  |

<sup>a</sup> The former residue indicates the one in SARS-CoV-2-CTD, and the latter indicates its equivalent in SARS-RBD.

<sup>b</sup> The number represent the counts of van der Waals contacts, which the indicated residues conferred. The number in the parentheses suggest the potential H-bond between the pair of residues. In this table, van der Waals contact was analyzed at the cutoff of 4.5 Å and the H-bonds at the cutoff of 3.5 Å. Residues in red are in the  $\beta 1'/\beta 2'$  loop.
